1 **Differential human mobility and local variation in human infection attack rate**

2 D. J. Haw<sup>1</sup>, D. A. T. Cummings<sup>2</sup>, J. Lessler<sup>3</sup>, H. Salje, S<sup>4,5,6</sup>, J. M. Read<sup>7</sup>, S. Riley<sup>1\*</sup>

3 1. MRC Centre for Outbreak Analysis and Modelling, Department of Infectious Disease  
4 Epidemiology, School of Public Health, Imperial College London, UK

5 2. Department of Biology, University of Florida, Gainesville, FL

6 3. Department of Epidemiology, Johns Hopkins University, Baltimore, MD

7 4. Mathematical Modelling of Infectious Diseases Unit, Institut Pasteur, Paris, France

8 5. CNRS, URA3012, Paris 75015, France

9 6. Center of Bioinformatics, Biostatistics and Integrative Biology, Institut Pasteur, Paris  
10 75015, France

11 7. Centre for Health Informatics Computing and Statistics, Lancaster Medical School,  
12 Lancaster University, Lancaster, UK

13 \*Corresponding author. Email address [s.riley@imperial.ac.uk](mailto:s.riley@imperial.ac.uk)

14 **Abstract**

15 Infectious disease transmission in animals is an inherently spatial process in which a host's  
16 home location and their social mixing patterns are important, with the mixing of infectious  
17 individuals often different to that of susceptible individuals. Although incidence data for  
18 humans have traditionally been aggregated into low-resolution data sets, modern representative  
19 surveillance systems such as electronic hospital records generate high volume case data with  
20 precise home locations. Here, we use a high resolution gridded spatial transmission model of  
21 arbitrary resolution to investigate the theoretical relationship between population density,  
22 differential population movement and local variability in incidence. We show analytically that  
23 uniform local attack rate is only possible for individual pixels in the grid if susceptible and  
24 infectious individuals move in the same way. Using a population in Guangdong, China, for  
25 which a robust quantitative description of movement is available (a movement kernel), and a  
26 natural history consistent with pandemic influenza; we show that for the estimated kernel,  
27 local cumulative incidence is positively correlated with population density when susceptible  
28 individuals are more connected in space than infectious individuals. Conversely, when  
29 infectious individuals are more connected, local cumulative incidence is negatively correlated  
30 with population density. The amplitude of correlation is substantial for the estimated kernel.  
31 However, the strength and direction of correlation changes sign for other kernel parameter  
32 values. These results describe a precise relationship between the spatio-social mixing of  
33 infectious and susceptible individuals and local variability in attack rates, and suggest a  
34 plausible mechanism for the counter-intuitive scenario in which local incidence is lower on  
35 average in less dense populations. Also, these results suggest that if spatial transmission  
36 models are implemented at high resolution to investigate local disease dynamics, including  
37 micro-tuning of interventions, the underlying detailed assumptions about the mechanisms of  
38 transmission become more important than when similar studies are conducted at larger spatial  
39 scales.

## 40 **Author Summary**

41 We know that some places have higher rates of infectious disease than others. However, at the  
42 moment, we usually only measure these differences for large towns and cities. With modern  
43 data, such as those we can get from mobile phones, we can measure rates of infection at much  
44 smaller scales. In this paper, we used a computer simulation of an epidemic to propose ways  
45 that rates of incidence in small local areas might be related to population density. We found  
46 that if infectious people are better connected than non-infectious people, perhaps because they  
47 receive visitors, then, on average, higher density areas would have lower rates of infection. If  
48 infectious people were less connected than non-infectious people then higher density areas  
49 would have higher rates of infection. As data get more accurate, this type of analysis will  
50 allow us to propose and test ways to optimize interventions such as the delivery of vaccines  
51 and antivirals during a pandemic.

## 52 **Introduction**

53 The spatial heterogeneity of infectious disease incidence at large scales presents numerous  
54 intervention opportunities and challenges. Maps of malaria prevalence [1] have been used to  
55 target additional surveillance and to prioritize countries and geographical regions for additional  
56 intervention investment, resulting in substantial decreases in numbers of infections [2]. Over  
57 shorter timescales, spatial asynchrony in the northern hemisphere during the 2009 influenza  
58 pandemic likely led to variable effectiveness of vaccination when eventually deployed because  
59 of prior infections [3]. The epidemiological implications of substantial spatial heterogeneity in  
60 both incidence and transmission are topics of active research for most human pathogens [4].

61 These spatial heterogeneities must be influenced by two key human behaviours: where people  
62 choose to live and how they move. Because the home location of an individual is primarily  
63 used as the geographic location when cases are recorded, absolute spatial incidence is driven  
64 by population density: where more people live in a given unit area, there is greater potential  
65 for cases. Accurate high resolution estimates of population density [5, 6] have helped refine  
66 global absolute estimates of disease incidence and prevalence [7, 8, 9]. In order for a directly  
67 transmitted human pathogen to move through space, at least one person must travel away from

68 home and meet another person. Even for vector borne pathogens such as malaria and Zika  
69 virus, typical distances traveled by the vector are much shorter than those traveled by human  
70 hosts. Human movement is captured by survey data on journeys to work [10],  
71 questionnaire-based surveys [11] and location logging of mobile devices [12, 13, 14].

72 Although spatial heterogeneity has been measured mainly at larger scales, modern pathogen  
73 surveillance enables more finely resolved incidence data sets, with details such as precise  
74 geographical location captured with increasing frequency by modern digital and biological  
75 technology. For example, the full genome of a pathogen can be made available in almost real  
76 time directly from clinical samples taken in the community [15], and the home location of  
77 everyone attending a health care facility can be extracted from clinical episode data [16].  
78 Because this level of geographical precision for high quality incidence data has not previously  
79 been available, both epidemiological and disease-dynamic studies of infectious disease have  
80 focused on predicting and explaining incidence patterns measured at larger spatial scales, often  
81 with all cases within an administrative unit reported together. Additional insights are likely  
82 being lost during this aggregation process.

83 Available evidence and intuition suggests that infectious and non-infectious individuals have  
84 different social interactions during an outbreak [17], with plausible scenarios in which either  
85 one or the other may be more connected in space. For example, susceptible individuals are  
86 more likely to travel than are infectious individuals with mild symptoms [18]. However, family  
87 members and friends of infectious individuals may often not behave in the same way as an  
88 average susceptible individual. Also, infectious individuals themselves may travel long  
89 distances away from transmission hotspots to seek medical care during outbreaks of highly  
90 pathogenic infections [19].

91 Disease dynamic models are often used to study infection incidence and are defined primarily  
92 by their force-of-infection (FOI) term: a precise mathematical specification of how the risk of  
93 infection experienced by a susceptible individual is driven by the number of currently  
94 infectious individuals and by their characteristics. For example, the ages of infectious and  
95 susceptible individuals must sometimes affect the risk of infection, as must the distance

96 between their home addresses. Disease dynamic models that represent space [20] are now used  
97 routinely to understand large-scale spatial heterogeneity in incidence: to estimate the relative  
98 effectiveness of spatially heterogeneous interventions (given the observed incidence); to reveal  
99 underlying social mechanisms of transmissions; and, with increasing frequency, to forecast  
100 future spatial incidence patterns [21]. All transmission models that represent space include  
101 some kind of spatial kernel - a formal definition of the way in which individuals from different  
102 locations distribute their influence over the whole of geographical space.

103 However, there is substantial variability in the underlying FOI assumptions made in these  
104 models, which are often not discussed explicitly and have likely only rarely made material  
105 differences to model-based results aggregated at larger spatial scales. Nonetheless, we  
106 hypothesise that these different FOI assumptions represent important alternate hypotheses for  
107 the mechanisms of transmission and may lead to substantial structural biases in the predictions  
108 of attack rates at smaller spatial scales. Here, we propose a general theoretical framework for  
109 the study of infectious disease incidence at arbitrarily small spatial scales and, in particular, we  
110 look at the relative mobility of infectious individuals relative to susceptible individuals as a  
111 potential driver of heterogeneity in incidence.

## 112 **Results**

113 Algebraic analyses show that differential spatial connectivity of susceptible and infectious  
114 individuals can lead to variability in local attack rates (Protocol S1). Firstly, we showed that if  
115 susceptible and infectious individuals are assumed to be connected in the same way across all  
116 points in space, then local attack rates are uniform for any population density distribution or  
117 grid resolution. For lower resolution grids with large individual spatial elements, where the  
118 amplitude of connectivity of individuals outside their home grid square is small, the impact of  
119 differential connectivity between susceptible and infectious individuals is still negligible, even  
120 to the point that it is reasonable to assume that infectious individuals have no connectivity at  
121 all outside their home location. However, as the resolution of the grid increases and squares  
122 become smaller, individuals have a substantial number of connections outside their own grid  
123 square. Under this scenario, it was no longer possible to prove analytically that differences in

124 the connectedness of susceptible and infectious individuals would not lead to local variation in  
125 attack rates. These analytical results were not affected by the presence of age stratification in  
126 the transmission process, so long as the behavior and distribution of age groups was assumed  
127 to be uniform across space.

128 We established a baseline numerical scenario by implementing the underlying transmission  
129 model (see Methods) as ordinary differential equations (ODEs). Using: a  $1 \text{ k}^2$  gridded  
130 population density (55 by 33 k to the east and north of Guangzhou, China); a spatial contact  
131 kernel estimated in the same population [22]; and a basic reproductive number  $R_0 = 1.8$ ; we  
132 recovered a global uniform attack rate of  $z = 0.73$ . We also introduced age-stratified  
133 populations and transmission using parameters estimated in this population [11]. For this  
134 population, accurate high-resolution data on local age distributions were not available,  
135 therefore, we assumed that all grid squares had populations with the same age distribution,  
136 even though the total number of individuals in a grid square varied substantially. This addition  
137 of age effects in the transmission process did not introduce spatial variation but did reduced the  
138 uniform global attack rate to  $z = 0.43$ . We validated the precision of attack rates obtained  
139 from the ODEs using age- and space-stratified refinements [20] of the standard implicit  
140 equation relating attack rate to  $R_0$   $z = 1 - e^{-R_0 z}$  [23] and .

141 We hypothesized that both population density and the gradient of population density may  
142 influence small-scale attack rates in these models. Figures 1A and 1B show the uniform attack  
143 rate when using dual mobility with four age classes, plotted against log of population density  
144 and gradient of log population density respectively (with log gradient defined as the average  
145 difference between the log of a location's resident population and that of its 8 immediate  
146 neighbours).

**Figure 1** *The relationship between: force-of-infection (FOI) assumptions, local attack*

*rates, population density and population density gradient; for a pandemic-influenza-like epidemic. FOI assumptions are explained in the text. The LHS shows the relationship between the  $\log_{10}$  population density and attack rate for (A) dual mobility, (C) S-mobility and (E) I-mobility. The RHS shows the relationship between the gradient of  $\log_{10}$  population density and attack rate for (B) dual mobility, (D) S-mobility and (F) I-mobility. Population gradient was defined as the difference between the population density of a cell and the average population density of the 9 surrounding cells in the square lattice.*

147 When only susceptible individuals were assumed to be mobile, location-specific attack rates  
148 were positively correlated with log population density, correlation coefficient  $c=0.75$   
149 (Figure 1C). Attack rates varied between a minimum of 33.72% to a maximum of 45.76%, an  
150 absolute range of 12.04%. Location-specific attack rates were slightly less correlated with the  
151 log gradient of population density (correlation coefficient  $c=0.73$ , Figure 1D). Locations with  
152 higher attack rates tended to be densely populated relative to neighboring locations  
153 (Figures 2A and 2C). Figure 2B illustrates the uniformity in attack rate obtained from dual  
154 mobility (locations with attack rate 0 are empty).

**Figure 2** *Population density. Location-specific attack rates for (B) dual-mobility, (C) S-mobility and (D) I-mobility. We change color scale between plots to better illustrate the emergent patterns. A total of 3 pixels are unpopulated and so attack rates are necessarily always zero in these locations.*

155 Conversely, when only infectious individuals were assumed to be mobile, pixel attack rates  
156 were negatively correlated with log population density ( $c=-0.7707$ , Figure 1E) and even more  
157 strongly negatively correlated with log density gradient ( $c=-0.8816$ , Figure 1F). Attack rates  
158 varied over a greater range than for susceptible-only mobility: from a minimum of 32.61% to a  
159 maximum of 90.73%, with an absolute range of 58.12%. High attack rate pixels tended to be  
160 sparsely populated relative to neighboring locations (Figures 2A and 2D).

161 Measures of spatial variation are inherently dependent on the resolution of the model grid and

162 even the strong variability outlined above would be missed by most surveillance systems. The  
163 absolute range of attack rates for the susceptible-only movement was reduced to 1.67% when  
164 aggregated to 8km by 8km pixels. Even though the effect of infectious-only movement was  
165 stronger than for susceptible-only mobility, it was rapidly hidden by the aggregation of pixels,  
166 with the absolute range dropping to 3.78% when aggregated to 8km by 8km pixels. Results of  
167 aggregation are plotted in figures S1 and S2.

**Figure S1** *S-mobility: (A) initial result, aggregated into (B) 2km by 2km, (C) 4km by 4km, and (D) 8km by 8km squares.*

**Figure S2** *I-mobility: (A) initial result, aggregated into (B) 2km by 2km, (C) 4km by 4km, and (D) 8km by 8km squares.*

168 The direction of association between FOI assumptions and local attack rate was preserved and  
169 the amplitude remained substantial for intermediate scenarios in which both susceptible and  
170 infectious individuals were mobile but to differing degrees. If infectious individuals had any  
171 more contacts than susceptible individuals then attack rates were negatively correlated with  
172 population density, and vice versa (Figure 3). When infectious individuals reduced their travel  
173 by a factor of 0.5, the absolute range of attack rates was 5.38% and when susceptible  
174 individuals reduced their mixing by the same degree (with infectious agents fully mobile), the  
175 absolute range was 12.89%.

**Figure 3** *Limiting mobility of susceptible/recovered and immune agents according to parameters  $\delta$  and  $\epsilon$ , as described in the main text. Upper and lower surfaces show maximum and minimum values. Inset: correlation coefficient with population density*

176 The underlying mobility choice kernel  $K$  was defined by the relative probability of making a  
177 contact in a population at a distance  $x$  and of population size  $m$ . It was parameterized by an  
178 offset distance  $d$ , a distance power  $\gamma$  and destination population power  $\alpha$ ;  
179  $K = m^\alpha / (1 + d/x)^{-\gamma}$ , with values obtained by fitting to data from this population [22].  
180 Qualitatively, our conclusions about the impact of differential contact rates by susceptible



181 individuals were not sensitive to values for the offset distance  $d$  nor the distance power  $\gamma$   
182 (Figures 4A-4D). However, they were sensitive to values of the destination power  $\alpha$  for which  
183 we have used the best fit value of 0.53 (for results up to this point) (Figures 4E, 4F).  
184 Intriguingly, with the often-assumed default value  $\alpha = 1$ , the correlation between local attack  
185 rates and population density or gradient have the opposite sign (Figures S3 and S4). Moreover,  
186  $\alpha = 1$  induces weaker correlations with local population gradient.

**Figure 4** *Sensitivity analysis with respect to kernel parameters  $a$ ,  $p$  and  $\alpha$  using S-mobility (LHS) and I-mobility (RHS). Box plots show standard percentiles and outliers, solid lines show global attack rate. Dual mobility are omitted as they are flat with variance  $\sigma^2 = 0$ . Empty cells yield attack rate zero and are omitted from calculations.*

**Figure S3** *Sensitivity analysis: correlation coefficient of attack rate with population density (A) with  $a$  and  $p$  fixed, (B) S-mobility,  $p$  fixed, (C) I-mobility,  $p$  fixed, (D) S-mobility,  $a$  fixed, and (E) I-mobility,  $a$  fixed. Fixed parameters are set at optimal values discussed in the main text.*

**Figure S4** *Repeating results of figure 1 with  $\alpha = 1$ : (A) S-mobility/density, (B) S-mobility/gradient, (C) I-mobility/density, and (D) I-mobility/gradient.*

187 Stochastic solutions to the meta-population models suggest that attack rate variation driven by  
188 asymmetric mobility would not be dominated by demographic stochasticity (Figure 5).  
189 Although attack rate variation driven may be dominated by stochastic effects for small  
190 populations, this was not the case for medium and high population densities. For pixels with  
191 the smallest population, the amplitude of variation expected to arise from asymmetric mobility  
192 is similar to that which may arise by chance due to stochastic effects. However, as the size of  
193 the pixel populations increases, the expected amplitude of stochastic variation diminishes more  
194 quickly than does the expected amplitude of variation due to asymmetric mobility (Figure S5).  
195 For example, using susceptible-only mobility for 1km by 1km pixels with populations between  
196 1 and 85,163, the standard deviation in attack rate due to stochasticity is 9.45% while the

197 standard deviation of expected attack rates due to asymmetric mobility is 2.61%.

**Figure 5** *Mean and IQR over 50 iterations of stochastic model, using (A) S-mobility and (B) I-mobility.*

**Figure S5** *Ratio  $R$  of location-specific standard deviation over 50 iterations of stochastic model to standard deviation of corresponding deterministic model result over all pixels, using (a) S-mobility and (b) I-mobility.*

198 These results are robust to our choice of illustrative population density and to alternate natural  
199 history parameters. The same effects are observed when using population density of Puerto  
200 Rico with influenza natural history parameters (Figures S6) and with parameters that  
201 approximate vector-borne transmission, such as those of Zika or Chikungunya (Figure S7).  
202 Summary statistics for these alternate scenarios for a range of deterministic model variants we  
203 have studied are shown in Table S1.

**Table S1** *Summary statistics for different model parameters, populations and mobility assumptions. Results for different grid sizes involve aggregation of result obtained at 1km by 1km resolution. In all cases, empty cells are omitted from calculations. It is therefore possible to obtain a smaller minimum value of attack rate after aggregation.*

**Figure S6** *Simulated attack rates using population density of North-East Puerto-Rico, a 60km by 60km grid, and influenza-like natural history parameters  $R_0 = 1.8$ ,  $\gamma = 1/2.6$ , with (A) S-mobility plotted against population density, (B) S-mobility plotted against log population gradient, (C) I-mobility/density, and (D) I-mobility/gradient.*

**Figure S7** *Simulated attack rates using population density of North-East Puerto-Rico, a*

*60km by 60km grid, and natural history parameters  $R_0 = 4$ ,  $\gamma = 1/10$  approximating vector-borne transmission (e.g. Zika, Chikungunya), with (A)  $S$ -mobility plotted against population density, (B)  $S$ -mobility plotted against log population gradient, (C)  $I$ -mobility/density, and (d)  $I$ -mobility/gradient.*

## 204 **Discussion**

205 We have shown that, under the assumption that an individual's total contact is independent of  
206 home location and where they travel, substantial heterogeneity in local attack rates could arise  
207 if mobility is dependent on infection status. Moreover, the direction of the relationship  
208 between attack rate and population density is dependent on the relative attractiveness of  
209 densely populated destinations compared to less dense destinations. For the best estimate of  
210 that scaling for our population of interest, when susceptible individuals are more mobile than  
211 infectious individuals, attack rates are negatively correlated with population density.

212 Conversely, for the often implicitly assumption that the kernel is directly proportional to  
213 population size, susceptible-only movement is positively correlated with population density.

214 Our study has a number of limitations. We have not considered spatial variation in the age  
215 distribution of people, because these data were not available for our study population.

216 Variability in local attack rates will very likely also be driven in non-trivial ways by spatial  
217 correlation in the proportion of the population in different age classes. Nor have we considered  
218 multiple years of transmission which would extend the applicability of our results beyond  
219 pandemic scenarios for influenza and other emergent pathogens.

220 The negative correlation between local attack rate and population density that we observe with  
221 the most likely parameter values for some mobility assumptions is intriguing and somewhat  
222 counter intuitive. However, our sensitivity analysis with respect to kernel population power  $\alpha$   
223 provides insight into the underlying mechanisms. For example, consider the special case where  
224 only infectious people are mobile and  $\alpha$  tends to large values, making mobility dependent only  
225 on population density of location, and not on geographical distance. Under this scenario, high  
226 density cells will draw in more and more infectious people and therefore generate higher

227 attack rates. Conversely, if  $\alpha = 0$ , then mobility is dependent only on distance. Under this  
228 scenario, we can think of the infectious populations spilling out of their home locations into  
229 neighbouring ones. Thus, any sparsely populated location that is adjacent to a densely  
230 populated location will see an influx of infectious individuals resulting in a greater *proportion*  
231 infectious in that location, and therefore a stronger FOI and subsequent attack rate (Figure 6).

**Figure 6** *Illustration of the transmission process with infectious-only mobility: location  $x$  is locally densely populated, and prevalence is initially proportional to population density. If the travel kernel  $K$  is dominated by distance ( $\alpha$  small, c.f. figure S3a), then some of the infectious population in each pixel will relocate to neighbouring pixels. The result is a higher prevalence in locally sparsely populated pixels. Moreover, a larger local gradient will allow this phenomenon to persist. Infection status is recorded by home location, which, under the I-mobility assumption, is equivalent to location when susceptible/recovered.*

232 These results illustrate the potential knock-on effects of little or no dependence between  
233 transmissibility and population density: that infectious people from more densely populated  
234 areas go to nearby sparsely populated areas and in some sense "seek out" people in those areas  
235 to infect so they can reach their quota (I-mobility). Within the realm of parameters that are  
236 supported by studies of human movement and infectious processes, the behaviors implied by  
237 the models we presented here seem valid.

238 Mobility assumptions also have implications for the interpretation of attack-rates derived from  
239 individual-based models, many of which assume implicitly that the spread of infection is  
240 driven by the movement of individuals. We have shown that, whichever mobility assumption is  
241 made in a given model, it is possible to modify this assumption by replacing isotropic  $K$  by a  
242 convoluted non-isotropic kernel  $L$  that accounts for different contact patterns. In particular, the  
243 low-prevalence assumption makes this transformation achievable with minimal modification to  
244 existing computer programs. Therefore, developers of individual-based models may wish to  
245 consider alternate connectivity matrices for their simulations so as to explicitly reflect different  
246 spatial assumptions about the force of infection.

247 We have also shown that the implications of typical assumptions that are made in spatially  
248 explicit FOI terms, including approximations to this crucial normalization, are non-trivial at  
249 small spatial scales. Such assumptions are, however, often not addressed explicitly and so may  
250 contribute unknowingly to results. We hope to offer clarity in the interpretation of FOI in  
251 spatial models, and to have provided a comprehensive framework from which we can gain a  
252 deeper understanding of the role of spatial mobility in disease transmission dynamics as  
253 infectious disease incidence data become available at higher and higher spatial resolution.

## 254 **Methods**

### 255 *Spatial kernels*

256 Data taken from populations we study here show that total contacts made per day, and contact  
257 durations, do correlate with population density ( $p < 0.001$ , [11]), but that the strength of the  
258 relationship is weak. This is in part due to a typically older populations in urban areas, but also  
259 to the phenomenon of urban isolation [24]. When investigating the effect of mobility  
260 assumption alone in FOI, our main results made the baseline assumption that total contact and  
261 duration of contact is independent of home location.

262 The way in which these contacts are distributed in space does, however, depend on distance  
263 and population density, and is described via a spatial kernel  $K$ . In matrix notation,  $K_{ij}$  is  
264 defined as the proportion of time spent by an agent from location  $i$  in location  $j$ . The  
265 assumption of uniformity of total contact therefore means that the rows of  $K$  sum to unity. Our  
266 model employs the offset gravity kernel, defined as follows:

$$K_{ij} \propto \frac{N_i N_j^\alpha}{1 + (r_{ij}/a)^p} \quad (1)$$

267 with baseline parameters of  $a = 0.58$ ,  $p = 2.72$ ,  $\alpha = 0.52$ , where  $r_{ij}$  denotes the geodesic  
268 distance between the centre-points of cells  $i$  and  $j$ . Of the kernel structures studied in [22],  
269 offset gravity is shown to best represent contact data. Imposing the constraint that  $K$  is  
270 stochastic renders redundant the factor  $N_i$  in the numerator (owing to row-normalisation).

### 271 *Population density map*

272 We used rectangular excerpts from the Landscan dataset [25] with the lower left corner of the  
 273 rectangle located on the centre of the city of Guangzhou, China. The rectangle is 55 k from  
 274 east to west and 33 k from north to south, and a 4 k boundary area was excluded after  
 275 simulation.

276 The boundary area was chosen according to the following rationale: when population density  
 277 data for large suburban areas is truncated for the purpose of simulation, it is equivalent to  
 278 imposing empty space outside of the boundary, and this modification may effect the attack  
 279 rates calculated in cells close to that boundary. We ran simulations on a large area of 1km by  
 280 1km squares, and on smaller areas contained within this larger area. We found that attack rates  
 281 agree on all cells on the interior of the smaller area once a 4km perimeter is removed.

### 282 *Force-of-infection*

283 Let  $A$  denote the S-mobility kernel and  $B$  the I-mobility kernel. Then the age-independent  
 284 generalized FOI equation is given by:

$$\lambda_i = \beta \sum_j A_{ij} \frac{\sum_k B_{jk}^T I_k}{\sum_l [A_{jl}^T (N_l - I_l) + B_{jl}^T I_l]}. \quad (2)$$

285 For reduced mobility, movement of the non-infectious population is governed by a parameter  $\delta$   
 286 such that  $A = (1 - \delta)E + \delta K$ , where  $E$  is an identity matrix representing absence of spatial  
 287 mobility. Similarly, we describe mobility of infective individuals by  $\epsilon$  such that  
 288  $B = (1 - \epsilon)E + \epsilon K$ .

289 If  $K$  is the  $n \times n$  spatial kernel, indexed by  $i, j, k, l$ , and  $C$  the  $4 \times 4$  age-mixing matrix,  
 290 indexed by  $a, b, c, d$ , then the age-explicit dual-mobility equation is given by:

$$\lambda_{(a,i)}^D = \beta \sum_{b,j} K_{ij} \delta_{ab} \frac{\sum_{c,k} K_{jk}^T C_{bc} I_{(c,k)}}{\sum_{d,l} K_{jl}^T 1_{bd} N_{(d,l)}} \quad (3)$$

291 where  $1_{bc} = 1 \forall b, d$ . This can be combined with equation (2) to give the age-dependent system  
 292 with reduced mobility.

293 In all simulations presented in this study, we use the pointwise product of the matrices defining

294 number of contacts and duration of contact between age groups 0 – 4, 5 – 19, 20 – 64 and  
295 65+ derived in [11]. These age-mixing matrices were constructed from a contact surveys  
296 conducted in the region of Guangzhou used in our results.

### 297 *Model Solutions*

298 We define the gridded transmission model as ordinary differential equations. However, we also  
299 implement a stochastic compartmental version of the model and we calculate attack rates using  
300 recursive equations.

301 We used a standard SIR model with  $\dot{S}_i = -S_i\lambda_i$ ,  $\dot{I}_i = S_i\lambda_i - \gamma I_i$ ,  $\dot{R}_i = \gamma I_i$ . ODE models  
302 were seeded proportional to population density ( $\sigma = 10^{-4} \times \mathbf{N} / \sum_i N_i$ ), and agreed with final  
303 size calculations (which assume infinitesimal seeding). Integration of ODEs with full FOI in  
304 the S- and I-mobility case, i.e. with  $I_l(t)$  in denominators, showed low-prevalence  
305 approximations to be good. For example, in the main S-mobility result, the mean difference in  
306 cell attack rates between the full FOI and low prevalence approximation was  $6.22 \times 10^{-4}$  with  
307 maximum difference  $3.3 \times 10^{-3}$  occurring in a cell with population 726. Therefore, numerical  
308 solutions for all figures were obtained using the low prevalence approximation with infectious  
309 individuals in the numerator of the FOI but not the denominator (equations (18) and (22)). A  
310 selection of smaller examples agreed when checked using the full FOI.

311 The stochastic compartmental variant of our model selected the number of agents to infect  
312 from binomial distribution with parameters  $S_{(a,i)}$  and  $1 - \exp(-\lambda_{(a,i)})$ . This method requires  
313 specification of a time-step, and we found  $\Delta t = 1/6$  days to be sufficiently small (results did  
314 not change when  $\Delta t$  is doubled).

315 **Figures**

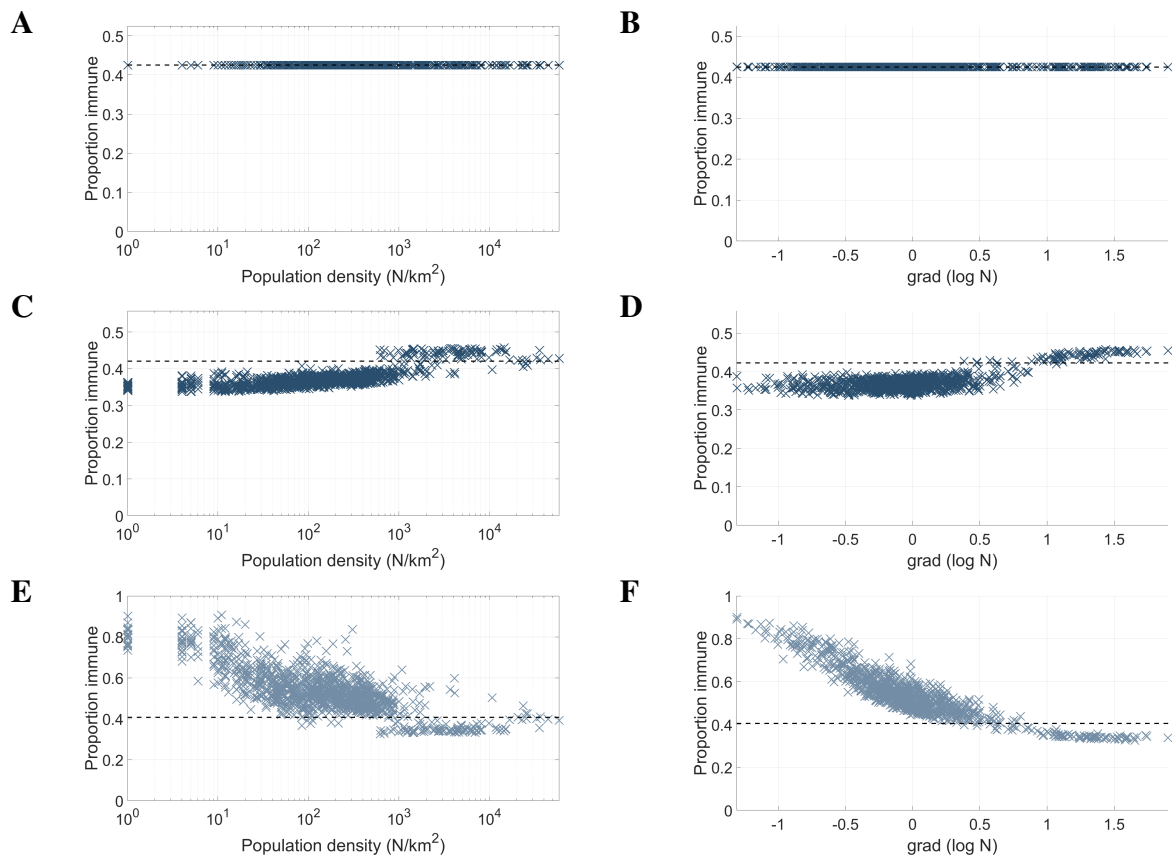

Figure 1: The relationship between: force-of-infection (FOI) assumptions, local attack rates, population density and population density gradient; for a pandemic-influenza-like epidemic. FOI assumptions are explained in the text. The LHS shows the relationship between the log<sub>10</sub> population density and attack rate for (A) dual mobility, (C) S-mobility and (E) I-mobility. The RHS shows the relationship between the gradient of log<sub>10</sub> population density and attack rate for (B) dual mobility, (D) S-mobility and (F) I-mobility. Population gradient was defined as the difference between the population density of a cell and the average population density of the 9 surrounding cells in the square lattice.



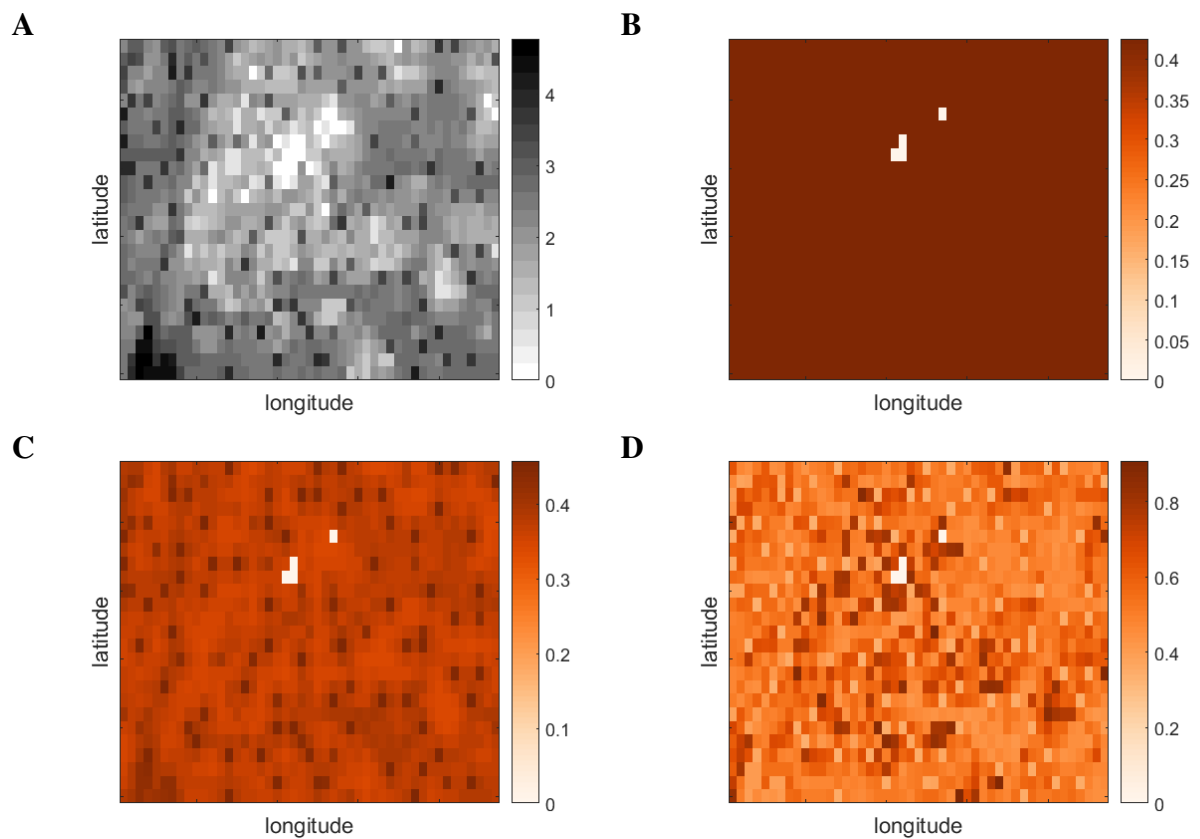

Figure 2: (A) Population density. Location-specific attack rates for (B) dual-mobility, (C) S-mobility and (D) I-mobility. We change colour scale between plots to better illustrate the emergent patterns. A total of 3 pixels are unpopulated and so attack rates are necessarily always zero in these locations.

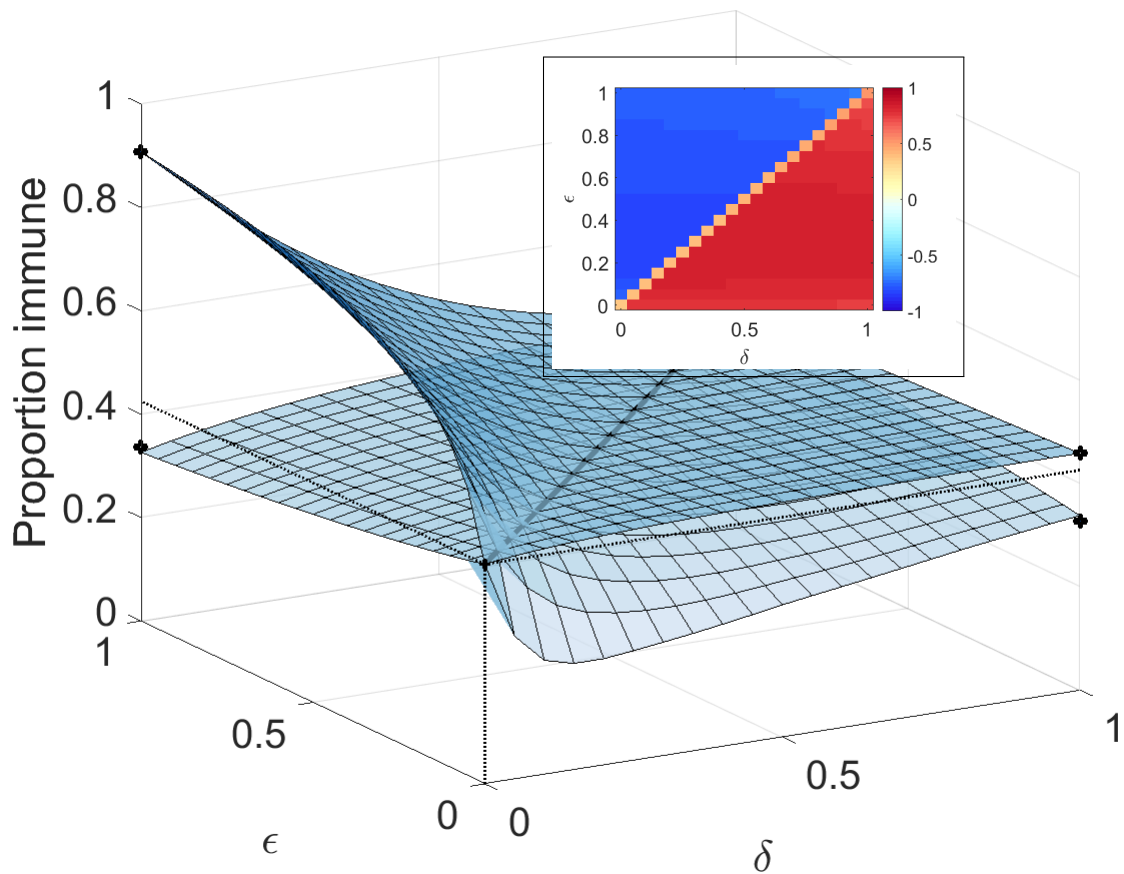

Figure 3: Limiting mobility of susceptible/recovered and immune agents according to parameters  $\delta$  and  $\epsilon$ , as described in the main text. Upper and lower surfaces show maximum and minimum values. Inset: correlation coefficient with population density

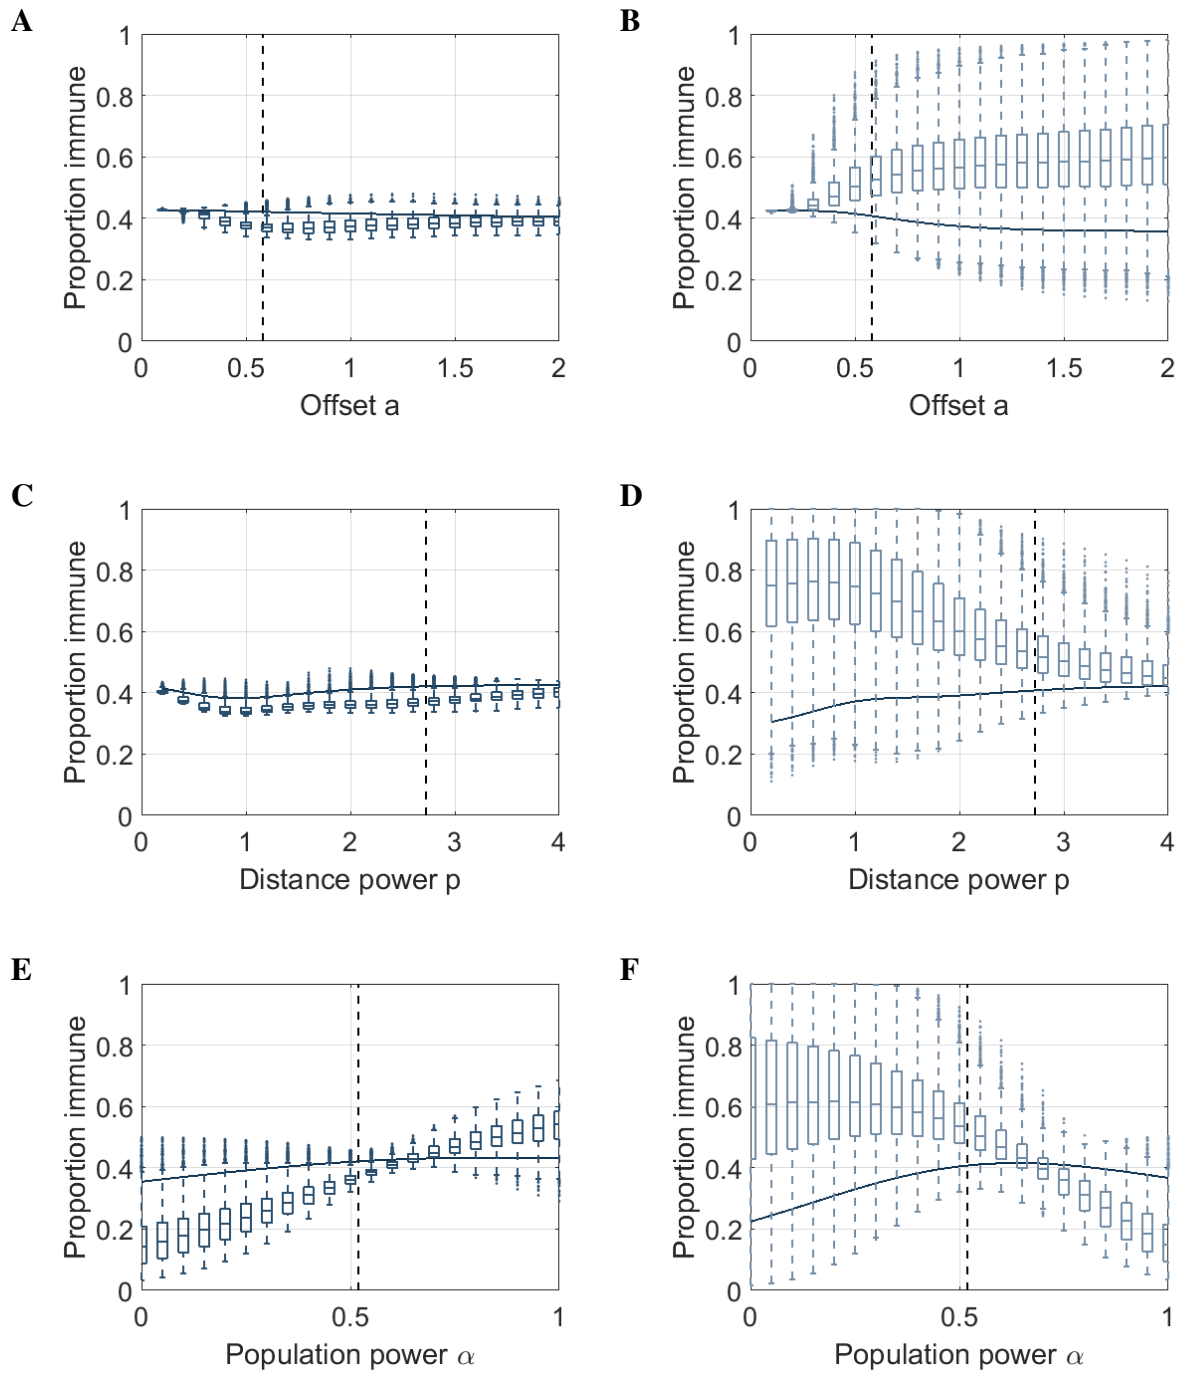

Figure 4: Sensitivity analysis with respect to kernel parameters  $a$ ,  $p$  and  $\alpha$  using S-mobility (LHS) and I-mobility (RHS). Box plots show standard percentiles and outliers, solid lines show global attack rate. Dual mobility are omitted as they are flat with variance  $\sigma^2 = 0$ . Empty cells yield attack rate zero and are omitted from calculations.

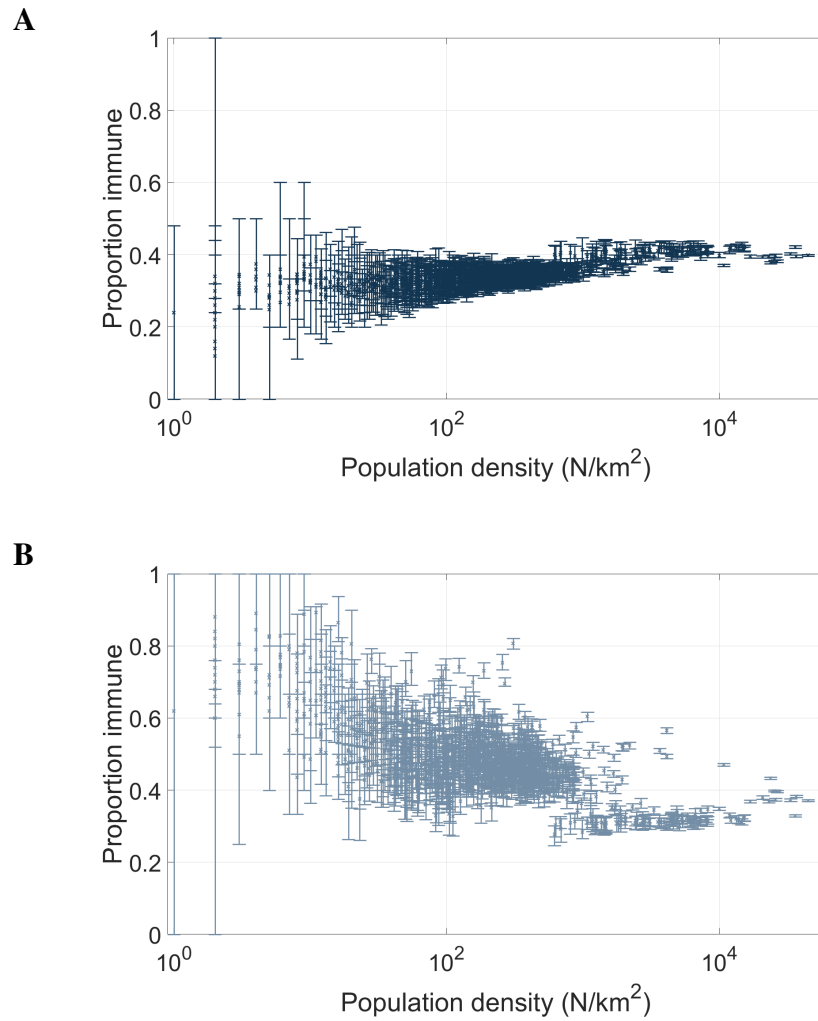

Figure 5: Mean and IQR over 50 iterations of stochastic model, using (A) S-mobility and (B) I-mobility.

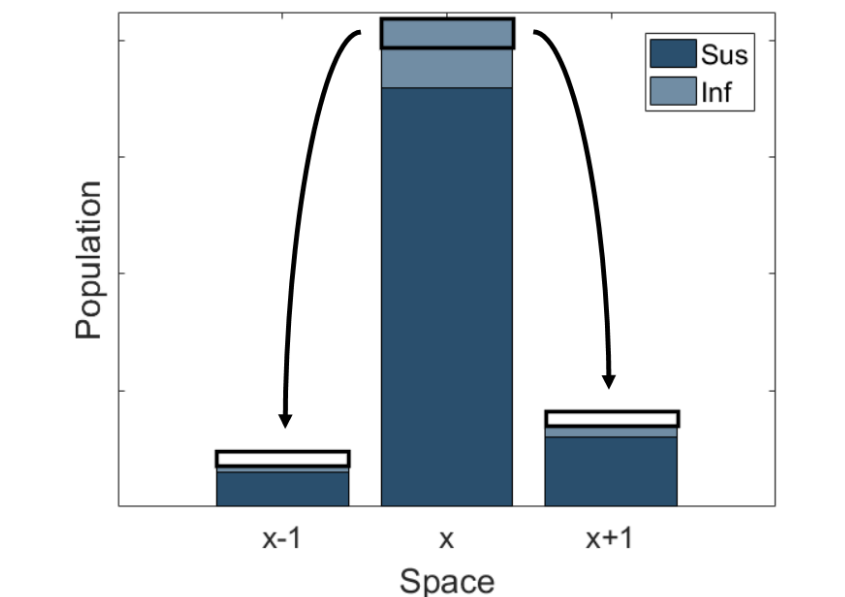

Figure 6: Illustration of the transmission process with infectious-only mobility: location  $x$  is locally densely populated, and prevalence is initially proportional to population density. If the travel kernel  $K$  is dominated by distance ( $\alpha$  small, c.f. figure S3a), then some of the infectious population in each pixel will relocate to neighbouring pixels. The result is a higher prevalence in locally sparsely populated pixels. Moreover, a larger local gradient will allow this phenomenon to persist. Infection status is recorded by home location, which, under the I-mobility assumption, is equivalent to location when susceptible/recovered.

## 316 **References**

- 317 [1] Hay SI, Snow RW. The malaria Atlas Project: developing global maps of malaria risk.  
318 PLoS Med. 2006 Dec;3(12):e473.
- 319 [2] Bhatt S, Weiss DJ, Cameron E, Bisanzio D, Mappin B, Dalrymple U, et al. The effect of  
320 malaria control on *Plasmodium falciparum* in Africa between 2000 and 2015. *Nature*.  
321 2015 Oct;526(7572):207–211.
- 322 [3] Charu V, Zeger S, Gog J, Bjørnstad ON, Kissler S, Simonsen L, et al. Human mobility  
323 and the spatial transmission of influenza in the United States. *PLoS Comput Biol*. 2017  
324 Feb;13(2):e1005382.
- 325 [4] Lessler J, Azman AS, McKay HS, Moore SM. What is a Hotspot Anyway? *Am J Trop*  
326 *Med Hyg*. 2017 Jun;96(6):1270–1273.
- 327 [5] Sutton P, Elvidge C, Obremski T. Building and Evaluating Models to Estimate Ambient  
328 Population Density. *Photogrammetric Engineering and Remote Sensing*.  
329 2003;69(5):545–553.
- 330 [6] Deville P, Linard C, Martin S, Gilbert M, Stevens FR, Gaughan AE, et al. Dynamic  
331 population mapping using mobile phone data. *Proceedings of the National Academy of*  
332 *Sciences*. 2014;111(45):15888–15893. Available from:  
333 <http://www.pnas.org/lookup/doi/10.1073/pnas.1408439111>.
- 334 [7] Hay SI, Snow RW. The Malaria Atlas Project: Developing global maps of malaria risk.  
335 PLoS Medicine. 2006;3(12):2204–2208.
- 336 [8] Stanaway JD, Flaxman AD, Naghavi M, Fitzmaurice C, Vos T, Abubakar I, et al. The  
337 global burden of viral hepatitis from 1990 to 2013: findings from the Global Burden of  
338 Disease Study 2013. *The Lancet*. 2016;388(10049):1081–1088.
- 339 [9] Rey J, Stanaway D, Shepard DS, Undurraga EA, Halasa YA, Coff LE, et al. The global  
340 burden of dengue: an analysis from the Global Burden of Disease Study 2013.  
341 [WwwTheLancetCom/Infection](http://www.thelancet.com/infection). 2016;16(6):712–723.

- 342 [10] Keeling MJ, Danon L, Ford AP, House T, Jewell CP, Roberts GO, et al. Networks and the  
343 epidemiology of infectious disease. *Interdisciplinary Perspectives on Infectious Diseases*.  
344 2011;2011.
- 345 [11] Read JM, Lessler J, Riley S, Wang S, Tan LJ, Kwok KO, et al. Social mixing patterns in  
346 rural and urban areas of southern China. *Proceedings of the Royal Society of London B:  
347 Biological Sciences*. 2014;281(1785).
- 348 [12] Gonzalez MC, Hidalgo CA, Barabasi AL. Understanding individual human mobility  
349 patterns. 2008;453(June). Available from:  
350 <http://arxiv.org/abs/0806.1256>{\%}0Ahttp:  
351 [//dx.doi.org/10.1038/nature06958](http://dx.doi.org/10.1038/nature06958).
- 352 [13] Vazquez-Prokopec GM, Bisanzio D, Stoddard ST, Paz-Soldan V, Morrison AC, Elder JP,  
353 et al. Using GPS Technology to Quantify Human Mobility, Dynamic Contacts and  
354 Infectious Disease Dynamics in a Resource-Poor Urban Environment. *PLoS ONE*.  
355 2013;8(4):1–10.
- 356 [14] Perkins TA, Garcia AJ, Paz-Soldan VA, Stoddard ST, Reiner RC, Vazquez-Prokopec G,  
357 et al. Theory and data for simulating fine-scale human movement in an urban  
358 environment. *Journal of The Royal Society Interface*. 2014;11(99):20140642–20140642.  
359 Available from: [http://rsif.royalsocietypublishing.org/cgi/doi/  
360 10.1098/rsif.2014.0642](http://rsif.royalsocietypublishing.org/cgi/doi/10.1098/rsif.2014.0642).
- 361 [15] Quick J, Grubaugh ND, Pullan ST, Claro IM, Smith AD, Gangavarapu K, et al.  
362 Multiplex PCR method for MinION and Illumina sequencing of Zika and other virus  
363 genomes directly from clinical samples. *Nat Protoc*. 2017 Jun;12(6):1261–1276.
- 364 [16] Paul P, Heng BH, Seow E, Molina J, Tay SY. Predictors of frequent attenders of  
365 emergency department at an acute general hospital in Singapore. *Emerg Med J*. 2010  
366 Nov;27(11):843–848.
- 367 [17] Funk S, Bansal S, Bauch CT, Eames KTD, Edmunds WJ, Galvani AP, et al. Nine  
368 challenges in incorporating the dynamics of behaviour in infectious diseases models.

- 369 Epidemics. 2015;10:21–25. Available from:  
370 <http://dx.doi.org/10.1016/j.epidem.2014.09.005>.
- 371 [18] Funk S, Salathé M, Jansen VAA. Modelling the influence of human behaviour on the  
372 spread of infectious diseases: a review. *J R Soc Interface*. 2010 Sep;7(50):1247–1256.
- 373 [19] Campbell GL, Hughes JM. Plague in India: a new warning from an old nemesis. *Ann*  
374 *Intern Med*. 1995 Jan;122(2):151–153.
- 375 [20] Riley S. Models of Infectious Disease. *Science*. 2007;316(5829):1298–1301. Available  
376 from: <http://www.sciencemag.org/cgi/content/abstract/316/5829/1298>.  
377
- 378 [21] Riley S, Eames K, Isham V, Mollison D, Trapman P. Five challenges for spatial epidemic  
379 models. *Epidemics*. 2015;10:68–71. Available from:  
380 <http://dx.doi.org/10.1016/j.epidem.2014.07.001>.
- 381 [22] Read J, Mills H. Is this on biorXiv yet?; 2017.
- 382 [23] Diekmann O, Heesterbeek JAP. *Mathematical Epidemiology of Infectious Diseases: Model Building, Analysis and Interpretation*. 1st ed. Wiley; 2000.
- 383
- 384 [24] Kinenberg E. *Dying Alone*; 2001.
- 385 [25] Dobson JE, Bright EA, Coleman PR, Durfee RC, Worley BA. LandScan: A global  
386 population database for estimating populations at risk. *Photogrammetric Engineering and*  
387 *Remote Sensing*. 2000;66(7):849–857. Available from:  
388 [http://apps.webofknowledge.com.libezp.lib.lsu.edu/full{\\\_  
389 }record.do?product=UA{\&}search{\\\_}mode=GeneralSearch{\&  
390 }qid=3{\&}SID=1D8vegIjNxsjNKm4nMs{\&}page=1{\&}doc=3](http://apps.webofknowledge.com.libezp.lib.lsu.edu/full{\_}{record.do?product=UA{\&}search{\_}mode=GeneralSearch{\&}qid=3{\&}SID=1D8vegIjNxsjNKm4nMs{\&}page=1{\&}doc=3).
- 391 [26] Ma J, Earn DJD. Generality of the final size formula for an epidemic of a newly invading  
392 infectious disease. *Bulletin of Mathematical Biology*. 2006;68(3):679–702.
- 393 [27] Clancy D, Pearce CJ. The effect of population heterogeneities upon spread of infection.  
394 *Journal of Mathematical Biology*. 2013;67(4):963–987.



395 [28] Sattenspiel L, Dietz K, Sattenspiel, L KD. A structured epidemic model incorporating  
396 geographic-mobility among regions. *Mathematical Biosciences*. 1995;128(1-2):71–91.  
397 Available from: [http://ac.els-cdn.com/002555649400068B/1-s2.0-002555649400068B-main.pdf?{\\\_}tid=ff279706-2cec-11e4-969f-00000aab0f27{\&}acdnat=1409035893{\\\_}54eb62e0eb7fc6ef3e78e7374f1d5343](http://ac.els-cdn.com/002555649400068B/1-s2.0-002555649400068B-main.pdf?{\_}tid=ff279706-2cec-11e4-969f-00000aab0f27{\&}acdnat=1409035893{\_}54eb62e0eb7fc6ef3e78e7374f1d5343).  
398  
399  
400

401 **Protocol S1: Algebraic analyses**

402 *Uniform local attack rates for dual mobility assumptions*

403 To show uniformity of attack rate with respect to space, we construct the final size equation for  
 404 the system. If the final size for age-group  $a$  in location  $i$  is given by  $z_{a,i} = R_{a,i}/N_i$ , then

$$\int_0^\infty \frac{\dot{S}_{a,i}}{S_{a,i}} dt = -\beta \sum_{b,j} L_{(a,i)(c,k)}^D \int_0^\infty \frac{I_{c,k}}{N_k} \quad (4)$$

$$\text{where } L_{(a,i)(c,k)} = K_{ij} \delta_{ab} \frac{\sum_{c,k} K_{jk}^T C_{bc} N_k}{\sum_{d,l} K_{jl}^T 1_{bd} N_{(d,l)}} \quad (5)$$

$$= K_{ij} \delta_{ab} \frac{\sum_k K_{jk}^T N_k \sum_c C_{bc}}{\sum_l K_{jl}^T N_l} \quad (6)$$

$$\text{so } \log(1 - z_{a,i}) - \log\left(\frac{N_{a,i}}{N_i}\right) = -\frac{\beta}{\gamma} \sum_{b,j} L_{(a,i)(c,k)}^D z_{c,k} \quad (7)$$

405 As reasoned in Ref [26] (for the S-mobility FOI with denominator  $N_i$ , and in the absence of  
 406 age-mixing), if there exists a solution  $\mathbf{z}$  such that  $z_{a,i} = x_a$ , i.e. final sizes are independent of  
 407 space, then we have:

$$\log(1 - z_{a,i}) - \log\left(\frac{N_{a,i}}{N_i}\right) = -\beta \sum_{b,j} K_{ij} \delta_{ab} \frac{\sum_k K_{jk}^T N_k}{\sum_l K_{jl}^T N_l} \sum_c C_{bc} x_c \quad (8)$$

$$= -\beta \sum_j K_{ij} \sum_c C_{ac} x_c \quad (9)$$

$$= -\beta \sum_c C_{a,c} x_c \quad (10)$$

408 If the distribution of age-groups is uniform in space, then we have  $N_{a,i}/N_i = q_a$ , and so, if  
 409 there exists a solution to the age-only final size equation:

$$\log(1 - \mathbf{x}) - \log \mathbf{q} = -\beta C \mathbf{x} \quad (11)$$

410 then  $z_{a,i} = x_a$  is a solution to equation (7), and final sizes are uniform in space.

411 *Relationship to other approximations in the literature*

412 It is shown in [26] that susceptible-only mobility induces uniformity of attack rate, using a FOI  
 413 with normalization by native population. In fact, we can show that uniformity is guaranteed  
 414 only when all agents are equally mobile, owing to denominator in the force of infection term,  
 415 which must be corrected to account for spatial mobility within the whole population.

416 For ease of notation, the following formulae are presented without explicit reference to  
 417 age-mixing, but this is always included in computational results (c.f. methods for age-explicit  
 418 formulae). The dual mobility FOI assumes that all agents are fully mobile as described by the  
 419 kernel  $K$  (a stochastic matrix). The dual mobility FOI on an agent resident in pixel  $i$  is given  
 420 by

$$\lambda_i^D = \beta \sum_j K_{ij} \frac{\sum_k K_{jk}^T I_k}{M_j} \quad (12)$$

$$M_j = \sum_l K_{jl}^T N_l \quad (13)$$

421 where  $M_j$  denotes the total population present in cell  $j$ . Crucially, when a model incorporates  
 422 spatial mobility, we can not say  $M_j = N_j$ . This FOI assumes frequency-dependent  
 423 transmission based on constant contacts, and describes the expected dynamics in an  
 424 agent-based system with explicit travel determined by  $K$ .

425 In the literature, the S- and I-mobility kernels are typically denoted as follows:

$$\lambda_i^S = \beta \sum_j K_{ij} \frac{I_j}{N_j} \quad (14)$$

$$\lambda_i^I = \beta \sum_j K_{ij}^T \frac{I_j}{N_i} \quad (15)$$

426 We claim that the denominators  $N_j$  and  $N_i$  do not accurately represent the population present  
 427 in cells  $j$  and  $i$  respectively in high resolution gridded models, owing to spatial mobility. The  
 428 argument below shows that the classic IM FOI serves as at least as a good approximation when  
 429 incidence is small, but the SM FOI does not.

430 Using the above equations, SM and DM both induce uniform cumulative attack rates in space.

431 The real SM FOI is significantly different to equation (14) in a way that is described by the

432 ratio of total time spent in each cell and the native population of that cell.

433 Consider deriving the S-mobility and I-mobility FOIs from the dual mobility FOI. This  
 434 involves starting with equation (12) and replacing either the single appearance of  $K$  or the  
 435 single appearance of  $K^T$  with the identity matrix (denoted  $E$  to avoid confusion with the  $I_i$ ),  
 436 and adjusting denominators  $M_j$  accordingly:

$$\lambda_i^S = \beta \sum_j K_{ij} \frac{\sum_k E_{jk}^T I_k}{I_j + \sum_l K_{jl}^T (N_l - I_l)} \quad (16)$$

$$= \beta \sum_j K_{ij} \frac{I_j}{I_j + \sum_l K_{jl}^T (N_l - I_l)} \quad (17)$$

$$\approx \beta \sum_j K_{ij} \frac{I_j}{\sum_l K_{jl}^T N_l} \quad (\text{first approximation}) \quad (18)$$

$$\approx \beta \sum_j K_{ij} \frac{I_j}{N_j} \quad (\text{second approximation}) \quad (19)$$

$$\lambda_i^I = \beta \sum_j E_{ij} \frac{\sum_k K_{jk}^T I_k}{N_j - I_j + \sum_l K_{jl}^T I_l} \quad (20)$$

$$= \beta \frac{\sum_k K_{ik}^T I_k}{N_i - I_i + \sum_l K_{jl}^T I_l} \quad (21)$$

$$\approx \beta \sum_j K_{ij}^T \frac{I_j}{N_i} \quad (22)$$

437 The denominator in equation (18) is not  $N_j$  (the native population of cell  $j$ ) but is instead the  
 438 population *present in cell  $j$*  according to  $K$ . In the case where these 2 quantities are equal, we  
 439 have uniformity of attack rates, as seen in the literature (using a similar argument to our proof  
 440 that the DM FOI induces uniform attack rates). This approximation makes the assumption that  
 441 prevalence is low, i.e.  $I_i \ll N_i \forall i$ .

442 The further approximation in equation (19) requires that the total number of people leaving  
 443 each cell is the same as the total number of people arriving in each cell, or, because the row  
 444 sums of  $K$  are equal to 1 ( $k$  is stochastic), then  $K^T$  is also stochastic. This is a weaker  
 445 assumption but is related to the  $N_i \rightarrow \infty$  approximation used in [27]. When using the full FOI  
 446 terms for S- and I-mobility, the only case in which these conventional mobility assumptions  
 447 induce uniformity of attack rate is when each location is equally visited (in mathematical  
 448 terms, uniformity of total contact means that the spatial kernel is a stochastic matrix, and the

449 latter requirement is equivalent to the transpose of  $K$  also being stochastic, hence  $K$  is  
450 orthogonal). The notion of normalization by total population present is not new to the  
451 literature [28], though is often excluded in the construction of spatial epidemic models.

#### 452 *Non-isotropic convoluted kernels*

453 It is possible to change the mobility assumption in an existing model via an effective, or  
454 convoluted kernel  $L$  such that replacing  $K$  with  $L$  in a given explicit FOI is equivalent to a  
455 change of mobility assumption. In fact, we can write any spatially explicit FOI in the form:

$$\lambda_i = \beta \sum_j L_{ik} \frac{I_k}{N_k}$$

456 for some matrix  $L$ . This formulation is essential in final size calculations. Then, for example,  
457 the convoluted D-mobility kernel  $L^D$  is given by  $L_{ik}^D = \sum_j K_{ij} K_{jk}^T N_j / M_j$ , where  
458  $M_j = \sum_l K_{jl} N_l$ , as in the main text. When using low-prevalence approximations, this can be  
459 done prior to numerical simulation, and so requires minimal additional modification to existing  
460 model codes.

#### 461 *Global transmissibility coefficient*

462 In all simulations, we use the next generation matrix (NGM) method [23] to derive a global  
463 transmissibility parameter  $\beta$  that yields our desired global  $R_0$ . NGMs are derived from  $\lambda_i$ ,  
464 evaluated at disease-free equilibrium (DFE). We can show that, in all 3 cases, using the  
465 approximations to S- and I-mobility given in equations (18) and (22) the value of  $\beta$  obtained is  
466 equal to that of the spatially heterogeneous system, maintaining heterogeneity in age only.

467 In the I-mobility case, the NGM is given by

$$G_{(a,i)(b,j)}^I = \frac{\beta}{\gamma} \frac{N_{(a,i)}}{N_i} C_{ab} K_{ij}^T \quad (23)$$

468 Since  $K$  is a stochastic matrix, we have  $\lambda_1(K) = 1$  and so  $\lambda_1(K^T) = 1$ , thus the dominant

469 eigenvalue of  $G^I$  is equal to the dominant eigenvalue of

$$G_{ab}^{age} = \frac{\beta}{\gamma} \frac{N_a}{N_{total}} C_{ab} \quad (24)$$

470 Using S-mobility, we have

$$G_{(a,i)(c,k)}^S = \frac{\beta}{\gamma} N_{a,i} C_{ac} K_{ik} \frac{1}{\sum_{d,l} K_{kl}^T N_{(d,l)}} \quad (25)$$

$$= \frac{\beta}{\gamma} C_{ac} \frac{K_{ki}^T N_{a,i}}{\sum_{d,l} K_{kl}^T N_{(d,l)}} \quad (26)$$

$$= \frac{\beta}{\gamma} C_{ac} X_{(a,i),(c,k)} \quad (27)$$

$$\text{where } X_{(a,i)(c,k)} : = \frac{K_{ki}^T N_{a,i}}{\sum_{d,l} K_{kl}^T N_{(d,l)}} \quad (28)$$

471 Note that  $X$  is a stochastic matrix, and so the dominant eigenvalue of  $G^S$  is equal to the

472 dominant eigenvalue of  $G^{age}$ .

473 A similar argument applies to dual mobility, where we have

$$G_{(a,i)(c,k)}^D = \frac{\beta}{\gamma} N_{a,i} C_{ac} \sum_j K_{ij} \frac{K_{jk}^T}{\sum_{d,l} K_{kl}^T N_{(d,l)}} \quad (29)$$

$$= \frac{\beta}{\gamma} C_{ac} \sum_j K_{kj} \frac{K_{ji}^T N_{a,i}}{\sum_{d,l} K_{kl}^T N_{(d,l)}} \quad (30)$$

$$= \frac{\beta}{\gamma} C_{ac} Y_{(a,i),(c,k)} \quad (31)$$

$$\text{where } Y_{(a,i)(c,k)} : = \sum_j K_{kj} \frac{K_{ji}^T N_{a,i}}{\sum_{d,l} K_{kl}^T N_{(d,l)}} \quad (32)$$

474 Here, since  $Y$  is the product of 2 stochastic matrices, it must itself be stochastic, and so the

475 dominant eigenvalue of  $G^D$  is also equal to the dominant eigenvalue of  $G^{age}$ .

476 The arguments presented above for susceptible-only and dual mobility require that the same

477 travel kernel  $K$  be used to describe the movement of all age groups, i.e.  $K_{ij}$  be independent of

478  $a, b, c, d$ . It can be verified computationally that age-dependent mobility can indeed induce

479 different values of  $\beta$  to the spatially heterogeneous model, in all cases other than pure

480 infectious-only mobility. We reserve a detailed analysis of this scenario for a subsequent study.

481 **Supplementary figures and tables**

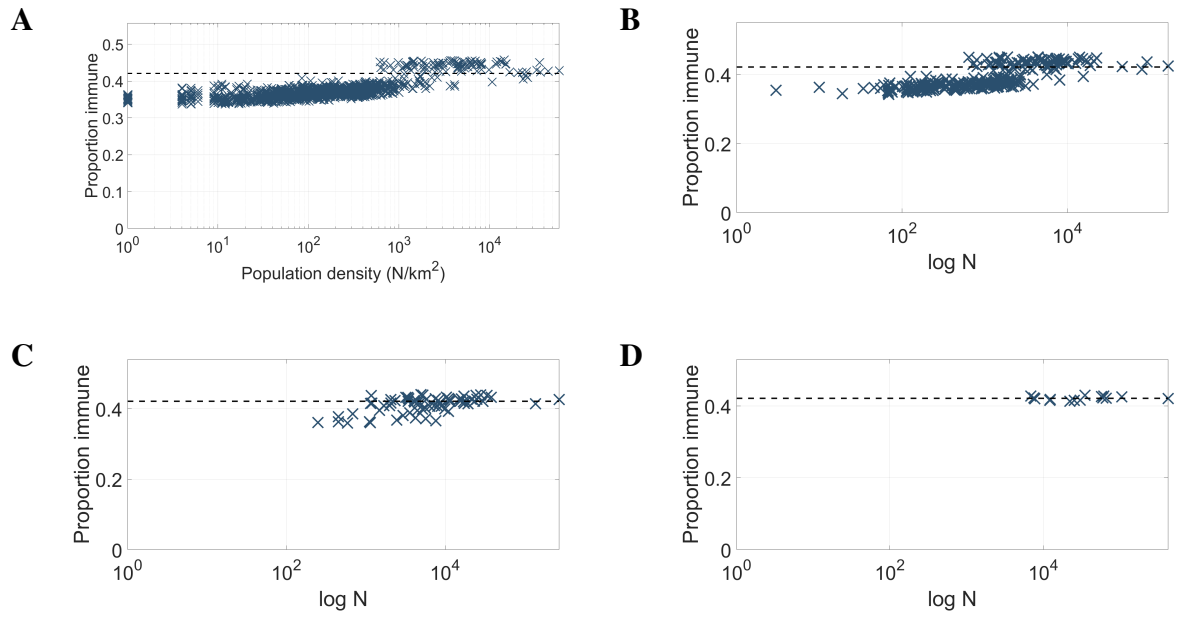

Figure S1: S-mobility: (A) initial result, aggregated into (B) 2km by 2km, (C) 4km by 4km, and (D) 8km by 8km squares.

| Model                   |             |            |               | Attack rate |        |         |            |             |
|-------------------------|-------------|------------|---------------|-------------|--------|---------|------------|-------------|
| $(R_0, \gamma, \alpha)$ | Population  | Grid       | Mobility ass. | Min.        | Max.   | Global  | $CC_{pop}$ | $CC_{grad}$ |
| (1.8, 1/2.6, 0.52)      | Guangzhou   | 1km by 1km | DM            | 0.425       | 0.425  | 0.425   | 0          | 0           |
|                         |             |            | SM            | 0.3372      | 0.421  | 0.4576  | 0.7469     | 0.7347      |
|                         |             |            | IM            | 0.3261      | 0.9073 | 0.4077  | 0.7707     | 0.8816      |
|                         | 4km by 4km  | DM         | 0.4576        | 0.4576      | 0.4576 | 0       | 0          | 0           |
|                         |             | SM         | 0.5523        | 0.7259      | 0.359  | 0.4214  | 0.4399     | 0           |
|                         |             | IM         | 0.3648        | 0.5384      | 0.4076 | -0.4651 | -0.6883    | 0           |
| (1.8, 1/2.6, 1)         | Guangzhou   | 1km by 1km | DM            | 0.425       | 0.425  | 0.425   | 0          | 0           |
|                         |             |            | SM            | 0.2909      | 0.6842 | 0.4316  | -0.5687    | -0.149      |
|                         |             |            | IM            | 0.0355      | 0.5029 | 0.3672  | 0.8213     | 0.5454      |
|                         | 4km by 4km  | DM         | 0.4576        | 0.4576      | 0.4576 | 0       | 0          | 0           |
|                         |             | SM         | 0.318         | 0.6657      | 0.431  | 0.7668  | 0.768      | 0           |
|                         |             | IM         | -0.0415       | 0.5029      | 0.3687 | 0.5384  | 0.4076     | 0           |
| (1.8, 1/2.6, .052)      | Puerto Rico | 1km by 1km | DM            | 0.4251      | 0.4251 | 0.4251  | 0          | 0           |
|                         |             |            | SM            | 0.3598      | 0.4703 | 0.4231  | 0.6323     | 0.738       |
|                         |             |            | IM            | 0.3405      | 0.9935 | 0.4181  | -0.7915    | -0.8887     |
|                         | 4km by 4km  | DM         | 0.4251        | 0.4251      | 0.4251 | 0       | 0          | 0           |
|                         |             | SM         | 0.3869        | 0.4591      | 0.4231 | 0.8866  | 0.5259     |             |
|                         |             | IM         | 0.3709        | 0.5932      | 0.4181 | 0.8193  | -0.8887    |             |
| (4, 1/10, 0.52)         | Puerto Rico | 1km by 1km | DM            | 0.912       | 0.912  | 0.912   | 0          | 0           |
|                         |             |            | SM            | 0.8683      | 0.9298 | 0.9111  | 0.6923     | 0.7631      |
|                         |             |            | IM            | 0.8615      | 1      | 0.9072  | -0.7528    | -0.9008     |
|                         | 4km by 4km  | DM         | 0.912         | 0.912       | 0.912  | 0       | 0          | 0           |
|                         |             | SM         | 0.8851        | 0.9248      | 0.9111 | 0.8805  | 0.4554     |             |
|                         |             | IM         | 0.8809        | 0.98        | 0.9072 | 0.864   | -0.2702    |             |

Table S1: Summary statistics for different model parameters, populations and mobility assumptions. Results for different grid sizes involve aggregation of result obtained at 1km by 1km resolution. In all cases, empty cells are omitted from calculations. It is therefore possible to obtain a smaller minimum value of attack rate after aggregation.



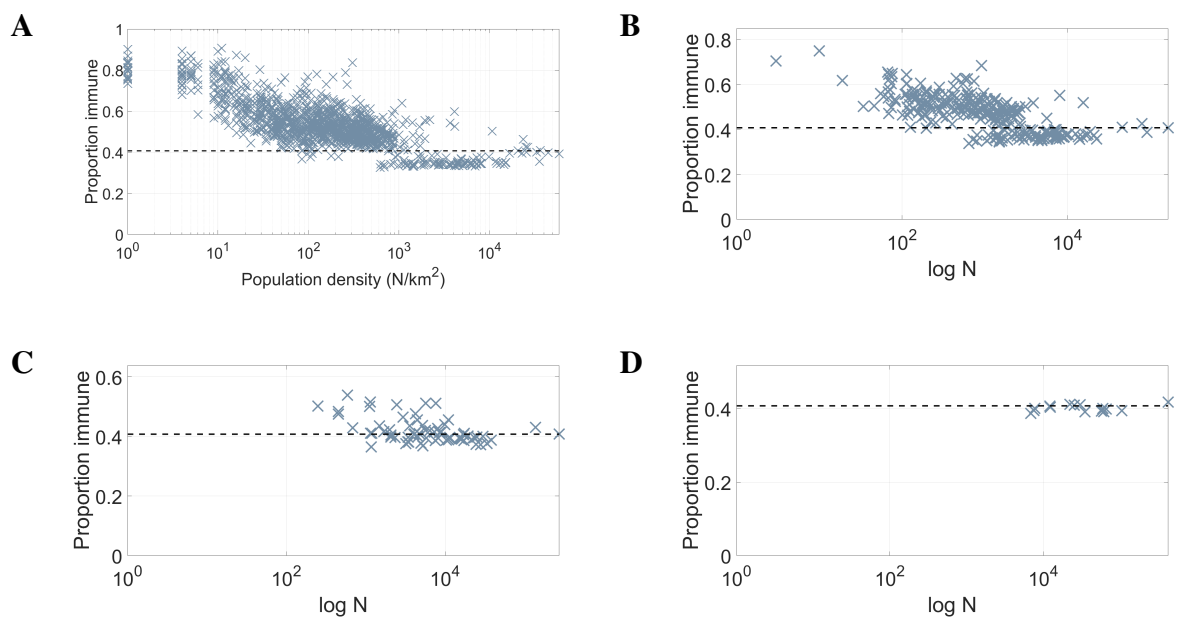

Figure S2: I-mobility: (A) initial result, aggregated into (B) 2km by 2km, (C) 4km by 4km, and (D) 8km by 8km squares.

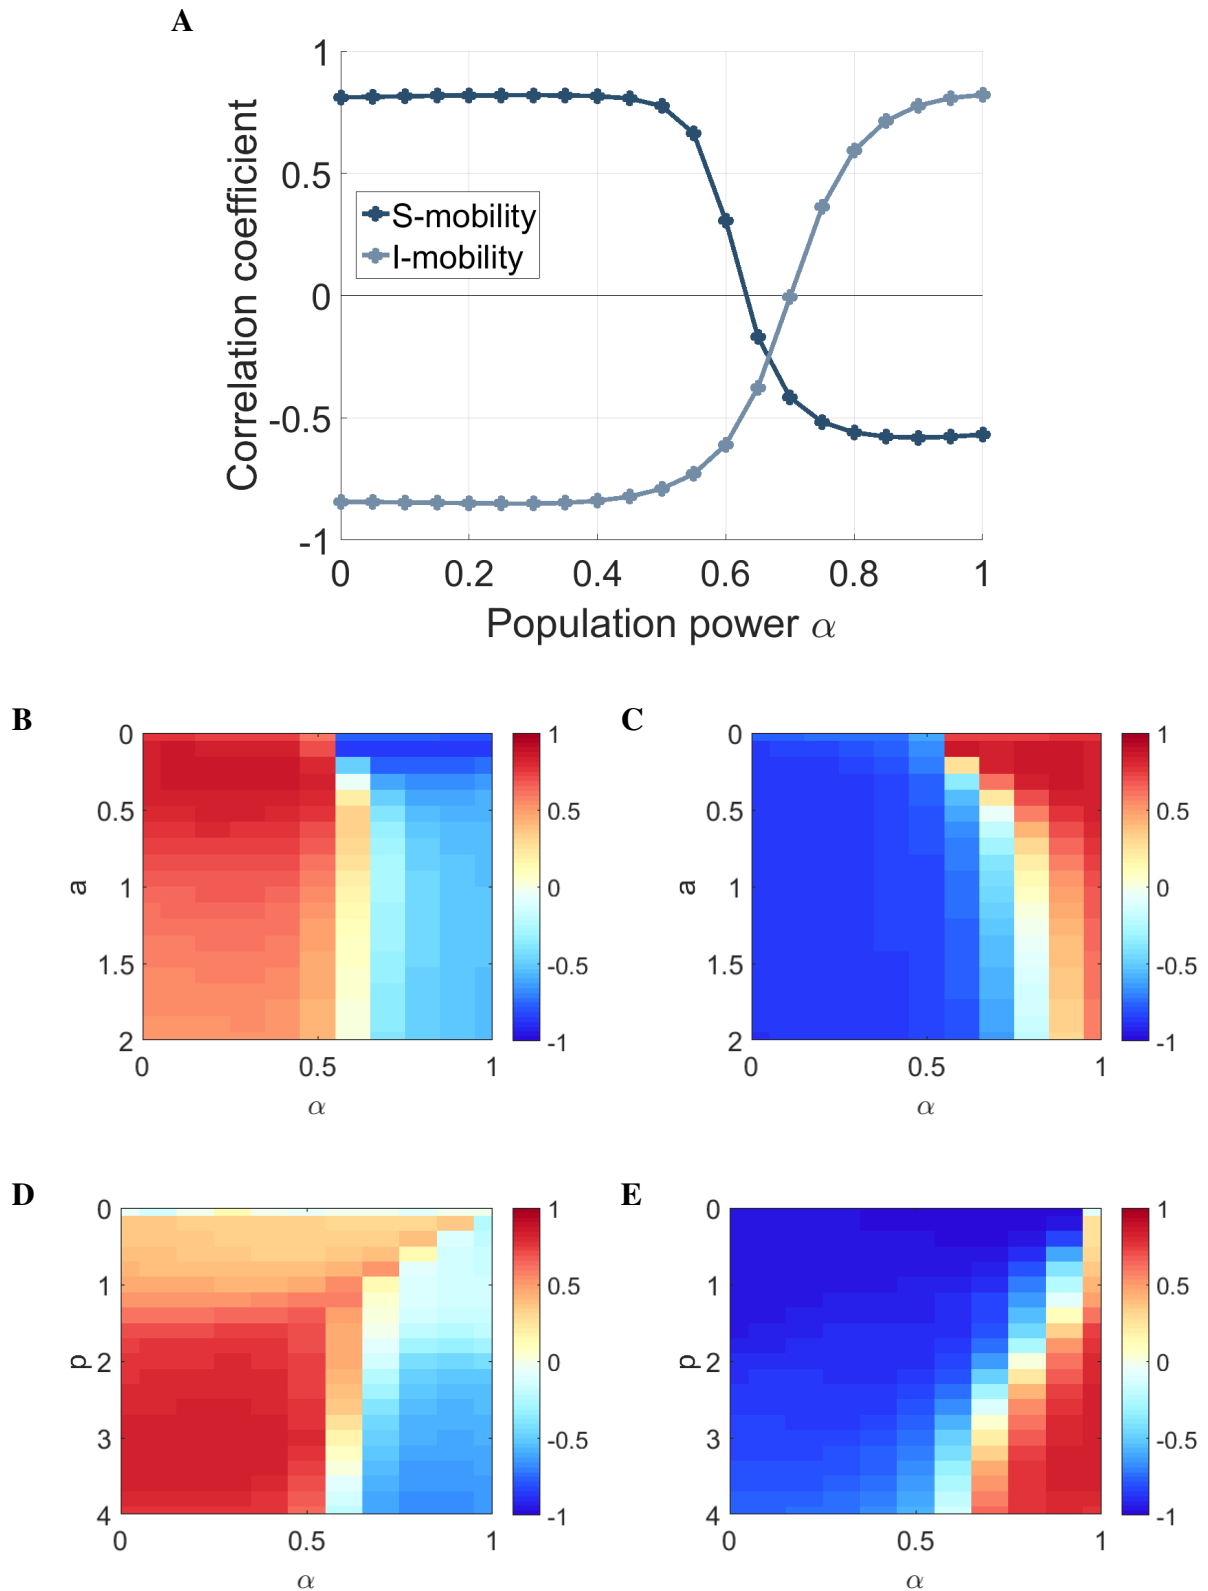

Figure S3: Sensitivity analysis: correlation coefficient of attack rate with population density (A) with  $a$  and  $p$  fixed, (B) S-mobility,  $p$  fixed, (C) I-mobility,  $p$  fixed, (D) S-mobility,  $a$  fixed, and (E) I-mobility,  $a$  fixed. Fixed parameters are set at optimal values discussed in the main text.

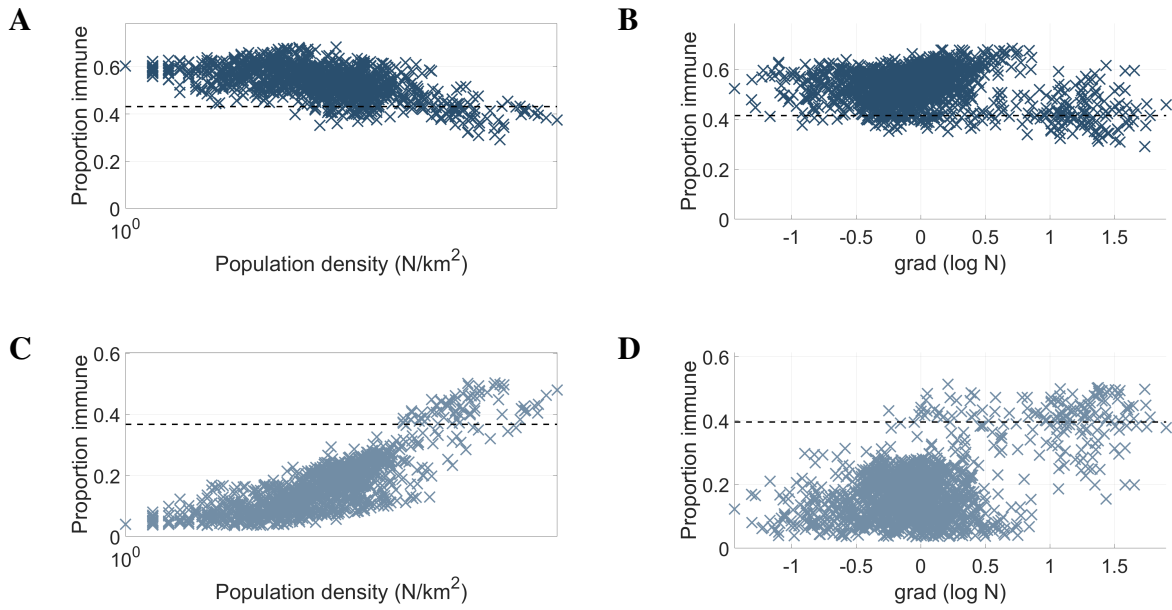

Figure S4: Repeating results of figure 1 with  $\alpha = 1$ : (A) S-mobility/density, (B) S-mobility/gradient, (C) I-mobility/density, and (D) I-mobility/gradient.

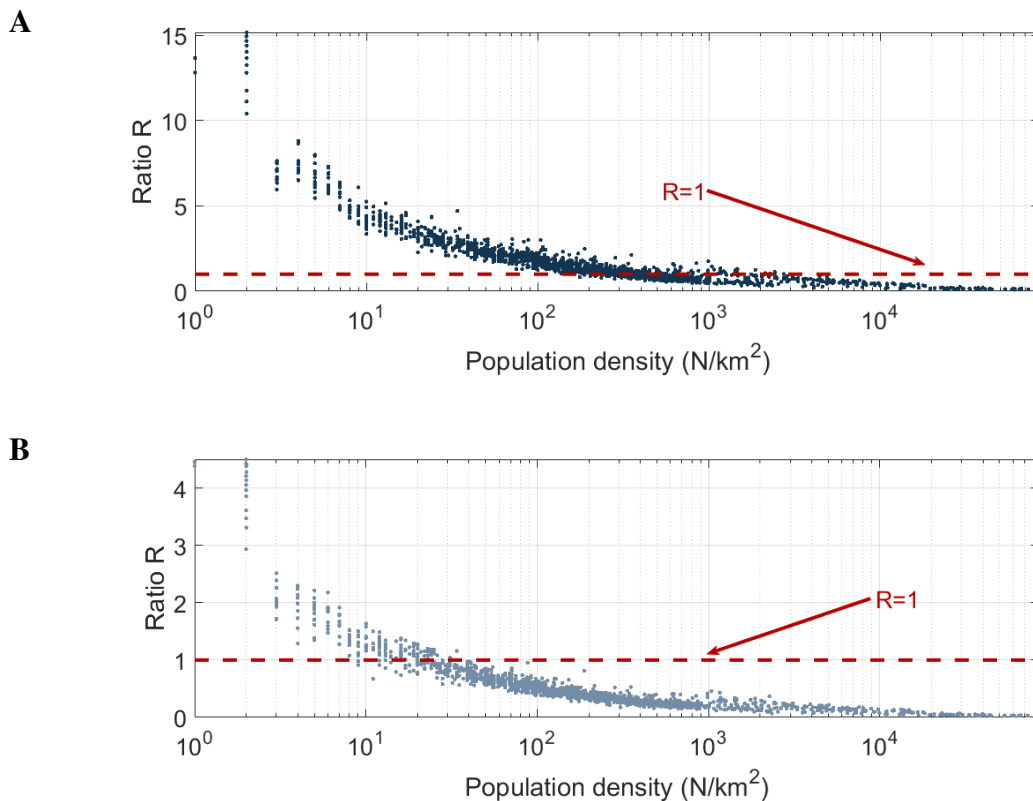

Figure S5: Ratio  $R$  of location-specific standard deviation over 50 iterations of stochastic model to standard deviation of corresponding deterministic model result over all pixels, using (a) S-mobility and (b) I-mobility.

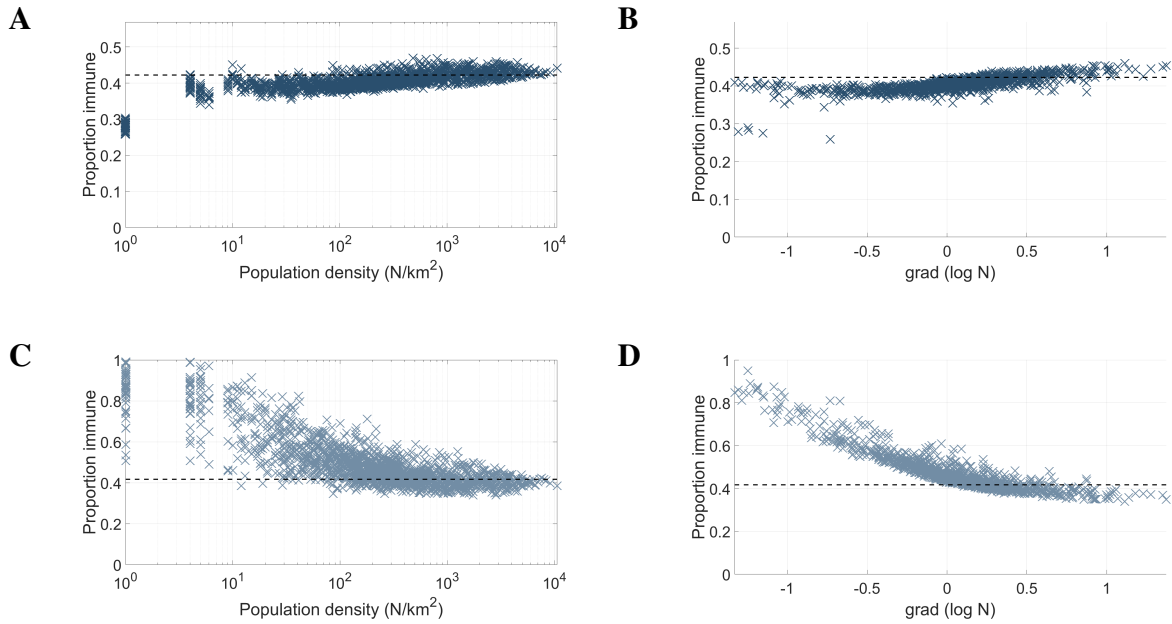

Figure S6: Simulated attack rates using population density of North-East Puerto-Rico, a 60km by 60km grid, and influenza-like natural history parameters  $R_0 = 1.8$ ,  $\gamma = 1/2.6$ , with (A) S-mobility plotted against population density, (B) S-mobility plotted against log population gradient, (C) I-mobility/density, and (D) I-mobility/gradient.

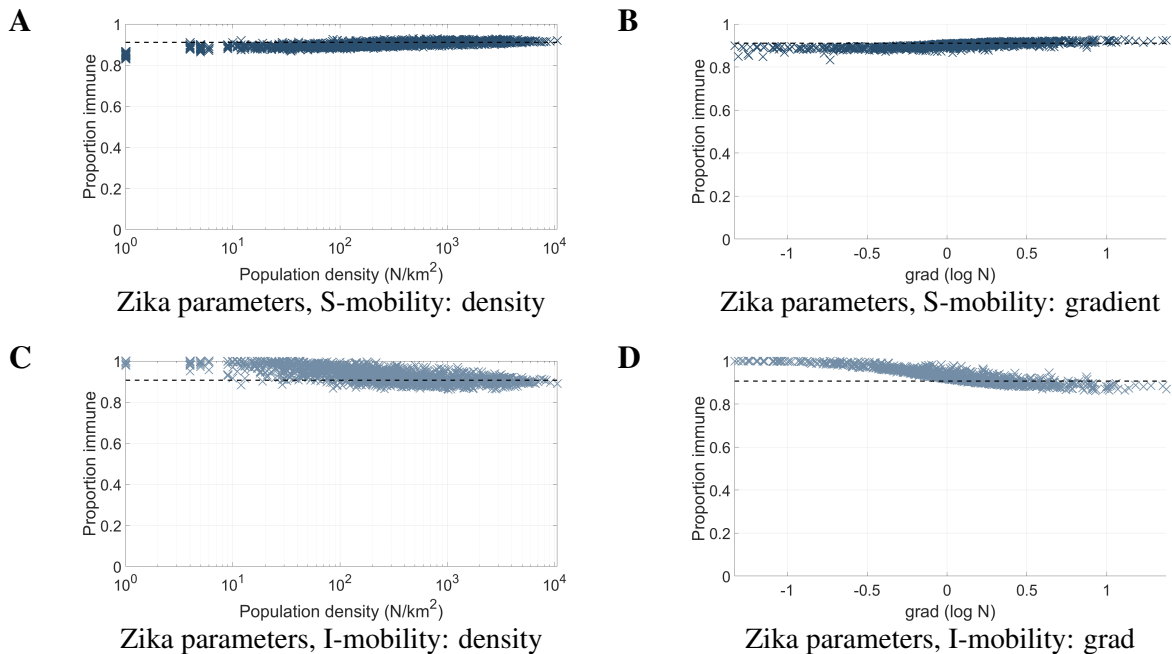

Figure S7: Simulated attack rates using population density of North-East Puerto-Rico, a 60km by 60km grid, and natural history parameters  $R_0 = 4$ ,  $\gamma = 1/10$  approximating vector-borne transmission (e.g. Zika, Chikungunya), with (A) S-mobility plotted against population density, (B) S-mobility plotted against log population gradient, (C) I-mobility/density, and (d) I-mobility/gradient.
